# Supplementary material
Source: PubMed Central journal article supplement (PMC8132312)
Supplement: NIHMS1697990-supplement-Supplemental_Material.pdf [file NIHMS1697990-supplement-Supplemental_Material.pdf]

Supplemental Table 1: Logistic Regression\* (Odds Ratio and 95% Confidence Interval) for PFAS Compounds with IgE levels in adolescent (ages 12-19) participants in NHANES 2005-2006

|                              | Milk              | Peanuts           | Shrimp            |
|------------------------------|-------------------|-------------------|-------------------|
| n Cases/controls             | 42/595            | 77/557            | 57/577            |
| PFOA Q1: ≤2.46 ng/mL         | 1.00              | 1.00              | 1.00              |
| PFOA Q2: 2.47 – 3.78 ng/mL   | 0.57 (0.14, 2.33) | 0.87 (0.41, 1.82) | 0.66 (0.14, 3.11) |
| PFOA Q3: 3.79 – 5.36 ng/mL   | 0.40 (0.09, 1.78) | 0.98 (0.31, 3.08) | 2.12 (0.61, 7.37) |
| PFOA Q4: >5.36 ng/mL         | 1.08 (0.29, 4.08) | 1.30 (0.75, 2.24) | 0.51 (0.14, 1.94) |
| PFOS Q1: ≤10.65 ng/mL        | 1.00              | 1.00              | 1.00              |
| PFOS Q2: 10.66 – 14.84 ng/mL | 0.90 (0.16, 4.98) | 1.30 (0.58, 3.92) | 1.13 (0.35, 3.60) |
| PFOS Q3: 14.85 – 22.69 ng/mL | 0.99 (0.25, 3.91) | 1.38 (0.59, 3.24) | 1.28 (0.56, 2.93) |
| PFOS Q4: >22.69 ng/mL        | 0.68 (0.13, 3.48) | 0.76 (0.23, 2.51) | 0.08 (0.01, 0.66) |
| PFNA Q1: ≤0.59 ng/mL         | 1.00              | 1.00              | 1.00              |
| PFNA Q2: 0.60 – 0.89 ng/mL   | 0.39 (0.04, 4.07) | 0.47 (0.13, 1.76) | 0.36 (0.10, 1.33) |
| PFNA Q3: 0.90 – 1.36 ng/mL   | 0.62 (0.11, 3.58) | 0.29 (0.13, 0.62) | 0.56 (0.21, 1.50) |
| PFNA Q4: >1.36 ng/mL         | 0.55 (0.09, 3.49) | 0.68 (0.28, 1.67) | 0.29 (0.09, 0.93) |
| PFHxS Q1: ≤1.00 ng/mL        | 1.00              | 1.00              | 1.00              |
| PFHxS Q2: 1.01 – 2.34 ng/mL  | 0.61 (0.18, 2.08) | 1.21 (0.57, 2.57) | 0.57 (0.26, 1.24) |
| PFHxS Q3: 2.35 – 4.29 ng/mL  | 1.15 (0.30, 4.36) | 1.70 (0.66, 4.41) | 0.23 (0.08, 0.64) |
| PFHxS Q4: >4.29 ng/mL        | 1.08 (0.32, 3.68) | 0.66 (0.21, 2.06) | 0.90 (0.37, 2.19) |

\* Adjusted for age, sex, race/ethnicity, BMI, c-Reactive Protein, Serum Cotinine

Supplemental Table 2: Logistic Regression\* (Odds Ratio and 95% Confidence Interval) for PFAS Compounds with food sensitization\*\* and self-reported food allergy outcomes in adolescent (ages 12-19) participants in NHANES 2005-2006 and 2007-2010, respectively

|                  | Food Sensitization**    | Food Allergy 2007-2010      |                                           |
|------------------|-------------------------|-----------------------------|-------------------------------------------|
|                  | 2005-2006<br>IgE Levels | Self-Reported Questionnaire | Peanuts + Tree nuts + Shellfish +<br>Fish |
| n Cases/controls |                         | 55/654                      | 22/687                                    |
| Ln_PFOA          | 1.02 (0.61, 1.68)       | 8.76 (3.53, 21.76)          | 5.11 (1.38, 18.89)                        |
| Ln_PFOS          | 0.82 (0.46, 1.45)       | 1.54 (1.02, 2.34)           | 1.96 (0.89, 4.32)                         |
| Ln_PFNA          | 0.83 (0.59, 1.16)       | 2.11 (0.91, 4.86)           | 0.78 (0.33, 1.84)                         |
| Ln_PFHxS         | 0.97 (0.79, 1.20)       | 1.30 (0.98, 1.73)           | 1.66 (0.97, 2.84)                         |

\* Adjusted for age, sex, race/ethnicity, BMI, and Serum Cotinine

\*\* Food sensitization defined as having at least 1 food specific IgE level  $\geq 0.35$  kU/L
